# Supplementary material for: Guiding and Leakage Dispersion Characteristic of TM01Mode in a Circular Dielectric Rod
Source: Hindawi journal article supplement (doi:10.1155/2022/7060674), 2022-10-17
Supplement: f1 [file 7060674.f1.zip]

Archive with 7 entries (7 files):
- Description of Suplementary Files.pdf
- fdavidenko.m
- fFTM.m
- fFTMt.m
- fOpen_Boundary_ChaEq_TM.m
- Open_Boundary_ChaEq_TM.m
- TM_leakymodes.m
