# Supplementary material for: Guiding and Leakage Dispersion Characteristic of TM01Mode in a Circular Dielectric Rod
Source: Hindawi journal article supplement (doi:10.1155/2022/7060674), 2022-10-17
Supplement: f1 [file 7060674.f1.zip › fdavidenko.m]

function dgam_dt=fdavidenko(t,gam)
  a=10e-3;
  er=4;
  load('fr')
  f=fr;w=2*pi*f;
  f=fFTM(w,er,a,gam);
  ft=fFTMt(w,er,a,gam);
  dgam_dt(1,1)=-(1/abs(ft)^2)*(real(ft)*real(f)+imag(ft)*imag(f));
  dgam_dt(2,1)=(1/abs(ft)^2)*(imag(ft)*real(f)-real(ft)*imag(f));
