# Supplementary material for: Guiding and Leakage Dispersion Characteristic of TM01Mode in a Circular Dielectric Rod
Source: Hindawi journal article supplement (doi:10.1155/2022/7060674), 2022-10-17
Supplement: f1 [file 7060674.f1.zip › fFTM.m]

function sonuc=fFTM(w,er,a,gam)
 e0=8.8542e-12;m0=pi*4e-7;
 k0=sqrt(w^2*e0*m0);
 gam=gam*k0;
 gam=gam(1)+sqrt(-1)*gam(2); 
 k1=sqrt(k0^2*er-gam.^2);
 k2=sqrt(k0^2-gam.^2);
 F1=(er/k1)*(besselj(1,k1*a)/besselj(0,k1*a));
 F2=(1/k2)*(besselh(1,2,k2*a)/besselh(0,2,k2*a));
 sonuc=F1-F2;
 
