# Supplementary material for: Guiding and Leakage Dispersion Characteristic of TM01Mode in a Circular Dielectric Rod
Source: Hindawi journal article supplement (doi:10.1155/2022/7060674), 2022-10-17
Supplement: f1 [file 7060674.f1.zip › fFTMt.m]

function sonuc=fFTMt(w,er,a,gam)
 j=sqrt(-1);
 e0=8.8542e-12;m0=pi*4e-7;
 k0=sqrt(w^2*e0*m0);
 gam=gam*k0;
 gam=gam(1)+sqrt(-1)*gam(2); 
 k1=sqrt(k0^2*er-gam^2);
 k2=sqrt(k0^2-gam^2);
 J1k1=besselj(1,k1*a);
 J0k1=besselj(0,k1*a);
 J1k1t=besselj(0,k1*a)-(1/(k1*a))*besselj(1,k1*a);
 J0k1t=-besselj(1,k1*a);
 H1k2=besselh(1,2,k2*a);
 H0k2=besselh(0,2,k2*a);
 H1k2t=besselh(0,2,k2*a)-(1/(k2*a))*besselh(1,2,k2*a);
 H0k2t=-besselh(1,2,k2*a);
 F11=(er/k1^2)*(J1k1/J0k1);
 F12=(er/k1)*((a*J1k1t*J0k1-J1k1*a*J0k1t)/J0k1^2);
 F21=(1/k2^2)*(H1k2/H0k2);
 F22=(1/k2)*((a*H1k2t*H0k2-H1k2*a*H0k2t)/H0k2^2);
 sonuc=(-gam/k1)*(-F11+F12)+(gam/k2)*(-F21+F22);
