# Supplementary material for: Guiding and Leakage Dispersion Characteristic of TM01Mode in a Circular Dielectric Rod
Source: Hindawi journal article supplement (doi:10.1155/2022/7060674), 2022-10-17
Supplement: f1 [file 7060674.f1.zip › fOpen_Boundary_ChaEq_TM.m]

function dis_eq=fOpen_Boundary_ChaEq_TM(w,er1,a,betai)
e0=8.8542e-12;
m0=pi*4e-7;%bosluk ve cubuk permuability
c=1/sqrt(e0*m0);
k0=w/c;
betaz=betai*k0;
k1=sqrt(k0^2*er1-betaz^2); %çubuk içindeki dalga sayýsý
k2=sqrt(betaz^2-k0^2);
J0=besselj(0,k1*a);
K0=besselk(0,k2*a);
J0t=-besselj(1,k1*a);
K0t=-besselk(1,k2*a);
M=[J0 -K0; (-sqrt(-1)*w*e0*er1/k1)*J0t (-sqrt(-1)*w*e0/k2)*K0t];
dis_eq=det(M);
