# Supplementary material for: Guiding and Leakage Dispersion Characteristic of TM01Mode in a Circular Dielectric Rod
Source: Hindawi journal article supplement (doi:10.1155/2022/7060674), 2022-10-17
Supplement: f1 [file 7060674.f1.zip › Open_Boundary_ChaEq_TM.m]

%Açýk kýlavuz icin TMmn iletilen modlarýn  saptanmasý 
%clear all;clc;
e0=8.8542e-12;
m0=pi*4e-7;%bosluk ve cubuk permuability
c=1/sqrt(e0*m0);
a=10e-3;
er1=4;
son=1000;
dis_cha=[];
for f=6.7e9:.1e9:15e9
    f
    w=2*pi*f;
    betai=linspace(1.001,sqrt(er1)-0.0001,son);  %faz sabiti ilgili aralýkta son adet parçaya bölünüyor
    for kk=1:son % her bir faz sabiti için disperisyon eþitliðinin degeri
        dis_eq(kk)=fOpen_Boundary_ChaEq_TM(w,er1,a,betai(kk));
    end
    gecisler=fgecis_DE2((dis_eq))
    % plot(betai,real(dis_eq))
    subplot(3,1,1)
    plot(betai,real(dis_eq))
    subplot(3,1,2)
    plot(betai,imag(dis_eq))
    subplot(3,1,3)
    plot(betai,abs(dis_eq))
    pause(1)
    if isempty(gecisler)==0
        betan=[];
        for kk2=1:length(gecisler(:,1))
            betai2=linspace(betai(gecisler(kk2,1)),betai(gecisler(kk2,2)),son);   
            for kk=1:son
                dis_eq(kk)=fOpen_Boundary_ChaEq_TM(w,er1,a,betai2(kk));
            end
            gecisler2=fgecis_DE2((dis_eq));
            if isempty(gecisler2)==0
                betan=[betan (betai2(gecisler2(1))+betai2(gecisler2(2)))/2];
            end
        end
        if isempty(betan)==0
            betan=[betan zeros(1,14-length(betan))];
            dis_cha=[dis_cha; f betan(1:14)];
        end
    end
    dis_cha(end,2:end)
end
%save('TM0n_a10mm_er4_ChaEq_guidedmodes','dis_cha','a','er1')
