# Supplementary material for: Guiding and Leakage Dispersion Characteristic of TM01Mode in a Circular Dielectric Rod
Source: Hindawi journal article supplement (doi:10.1155/2022/7060674), 2022-10-17
Supplement: f1 [file 7060674.f1.zip › TM_leakymodes.m]

zamanar=[0 10];
TM01=[1.5e9 -.98 .05];% [The operating fr.  the phase const.  the attnuation const.]
for fr=5e9:-.1e9:.1e9 % The operating frequency 
    save('fr','fr')
    basladeg=TM01(end,2:3);
    [t,gam]=ode45(@fdavidenko,zamanar,basladeg);
    plot(t,gam)
    pause(.5)
    fr
    gam(end,:)
    TM01=[TM01;fr gam(end,:)];
end
%save('TM01_a10mm_er4','TM01')
